# Supplementary material for: Effectiveness of Transition Care Intervention Targeted to High-Risk Patients to Reduce Readmissions: Study Protocol for the TARGET-READ Multicenter Randomized-Controlled Trial
Source: MDPI journal article supplement (doi:10.3390/healthcare11060886), 2023-03-18
Supplement: s1 [file s1]

## Information sheet – control group

### Participation at the TARGET-READ study

Madame, Sir,

Thank you for participating in the Target-READ study, which focuses on reducing the risk of rehospitalization for patients.

You have been selected to be part of the control group, and as such you will benefit from a normal discharge from the hospital. Your family doctor will soon receive a letter from the hospital with information about your hospital stay.

As announced, **someone will contact you by phone within a month** to ask you some questions, especially if you had to return to the hospital.

We thank you in advance for your very valuable cooperation.

The entire study team wishes you a safe return home and a speedy recovery.

For the research team, Professor Jacques Donzé

Contact in case of questions about the study:

| Study nurse                                      | Physician locally responsible<br>for the study at your hospital | Physician responsible for the<br>study                                 |
|--------------------------------------------------|-----------------------------------------------------------------|------------------------------------------------------------------------|
| [name]<br>[address]<br>[email]<br>[phone number] | [name]<br>[address]<br>[email]<br>[phone number]                | Prof. Dr. med. Jacques Donzé<br>[address]<br>[email]<br>[phone number] |
