# Supplementary material for: Effectiveness of Transition Care Intervention Targeted to High-Risk Patients to Reduce Readmissions: Study Protocol for the TARGET-READ Multicenter Randomized-Controlled Trial
Source: Healthcare (Basel). 2023 Mar 18;11(6):886. doi: 10.3390/healthcare11060886 (PMC10048511; doi:10.3390/healthcare11060886)
Supplement: Supplementary file 1 [file healthcare-11-00886-s001.zip]

Archive with 14 entries (14 files):
- healthcare-2273552_supplementarymaterial_information_atrialfibrillation_patient.pdf
- healthcare-2273552_supplementarymaterial_information_chronicrenalfailure_patient.pdf
- healthcare-2273552_supplementarymaterial_information_cirrhosis_patient.pdf
- healthcare-2273552_supplementarymaterial_information_controlgroup_patient.pdf
- healthcare-2273552_supplementarymaterial_information_copd_patient.pdf
- healthcare-2273552_supplementarymaterial_information_coronarydisease_patient.pdf
- healthcare-2273552_supplementarymaterial_information_diabetes_patient.pdf
- healthcare-2273552_supplementarymaterial_information_digestivebleeding_patient.pdf
- healthcare-2273552_supplementarymaterial_information_heartfailure_patient.pdf
- healthcare-2273552_supplementarymaterial_information_interventiongroup_familyphysician.pdf
- healthcare-2273552_supplementarymaterial_information_interventiongroup_patient.pdf
- healthcare-2273552_supplementarymaterial_information_peripheralarterialdisease_patient.pdf
- healthcare-2273552_supplementarymaterial_information_stroke_patient.pdf
- healthcare-2273552_supplementarymaterial_information_thromboembolicdisease_patient.pdf
